# Supplementary material
Source: Springer Nature journal article supplement (https://www.springermedizin.de/resource/supplementary/12968_2011_2569_MOESM2_ESM.pdf/9582254)

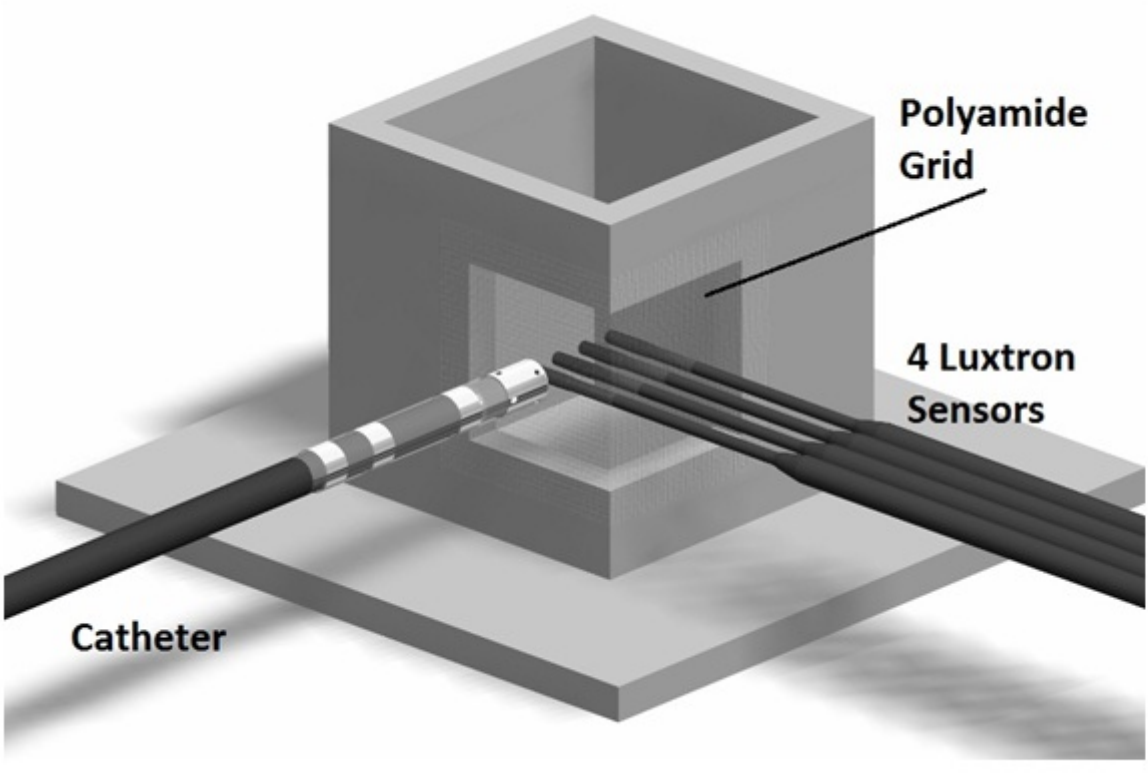

**Polyamide  
Grid**

**4 Luxtron  
Sensors**

**Catheter**

Supplement: MOESM2 [file 9582254]
